# Supplementary material
Source: PubMed Central journal article supplement (PMC6764921)
Supplement: NIHMS1537549-supplement-Supplementary_Material.pdf [file NIHMS1537549-supplement-Supplementary_Material.pdf]

## **Supplementary Information for**

### **Selection and gene flow shape**

### **niche-associated variation in pheromone response**

Daehan Lee, Stefan Zdraljevic, Daniel E. Cook,  
Lise Frézal, Jung-Chen Hsu, Mark G. Sterken, Joost A.G.  
Riksen, John Wang, Jan E. Kammenga, Christian Braendle,  
Marie-Anne Félix, Frank C. Schroeder, Erik C. Andersen

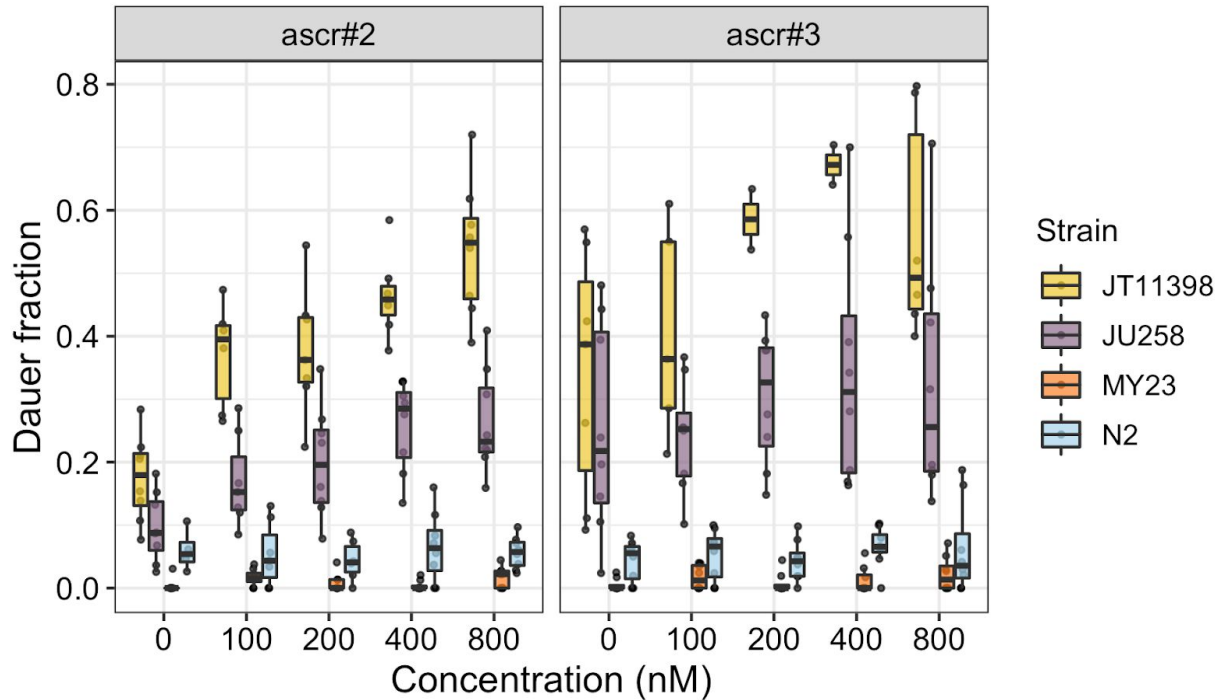

**Supplementary Fig. 1: Genetically divergent wild isolates show different dose responses to dauer pheromone (*ascr#2* and *ascr#3*) treatments**

Tukey box plots of the dose responses at 25°C for *ascr#2* (left) and *ascr#3* (right) for four divergent strains are shown with data points plotted behind. Box plots are colored by strain (JT11398 (yellow), JU258 (purple), MY23 (orange) and N2 (skyblue)). Concentrations of ascarosides are shown on the x-axis, and fractions of dauer larvae are shown on the y-axis. The horizontal line in the middle of the box is the median, and the box denotes the 25th to 75th quantiles of the data. The vertical line represents the 1.5 interquartile range.

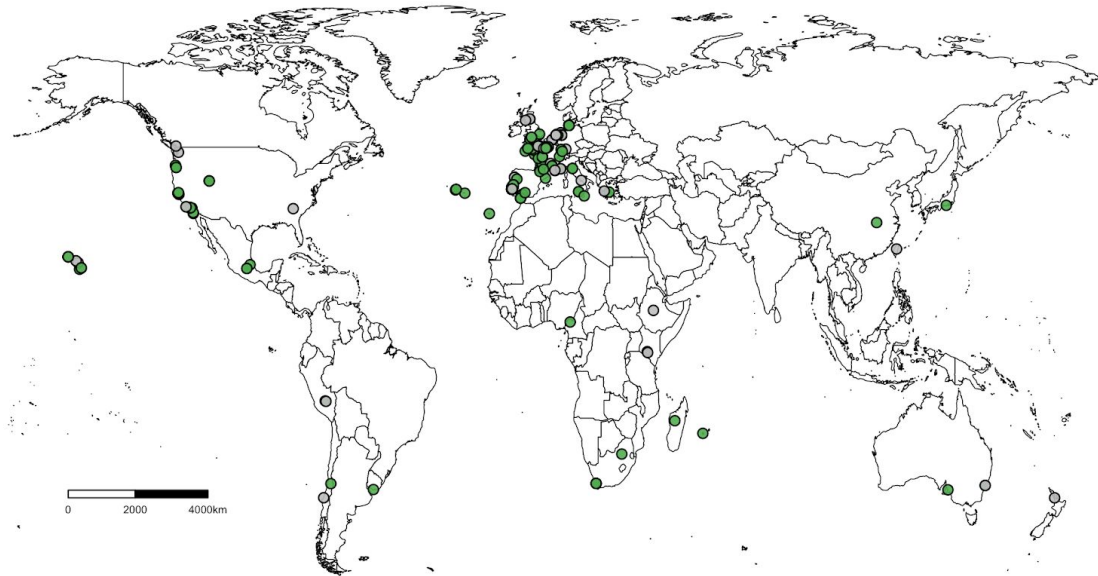

**Supplementary Fig. 2: Wild *C. elegans* strains have isolated across six continents**

Among the 249 wild strains that are available through the CeNDR, the global distribution of the 239 wild strains with known geographic origins is shown. Among the 157 wild strains that were tested using the HTDA, 151 wild strains with known geographic origins are shown as green circles. Wild strains that are not tested using the HTDA are shown as grey circles. A scale bar is shown in the map.

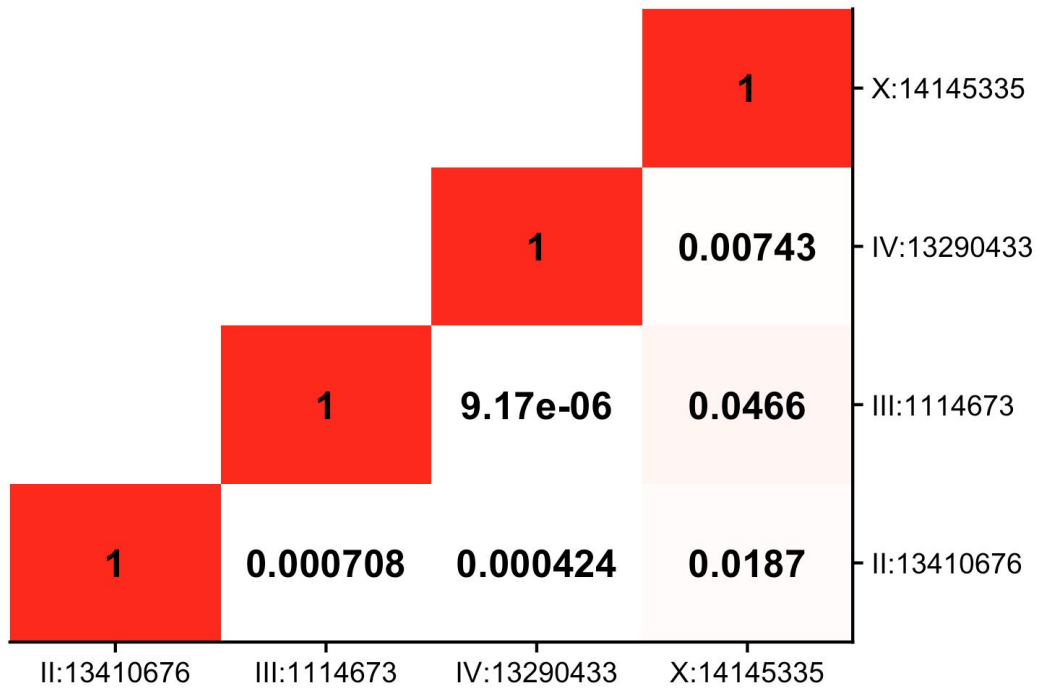

**Supplementary Fig. 3: Linkage disequilibrium is not observed among four QTL for ascr#5 response**

A heatmap plot that shows linkage disequilibrium (LD) among peak QTL markers as measured by the square of the correlation coefficient ( $r^2$ ).

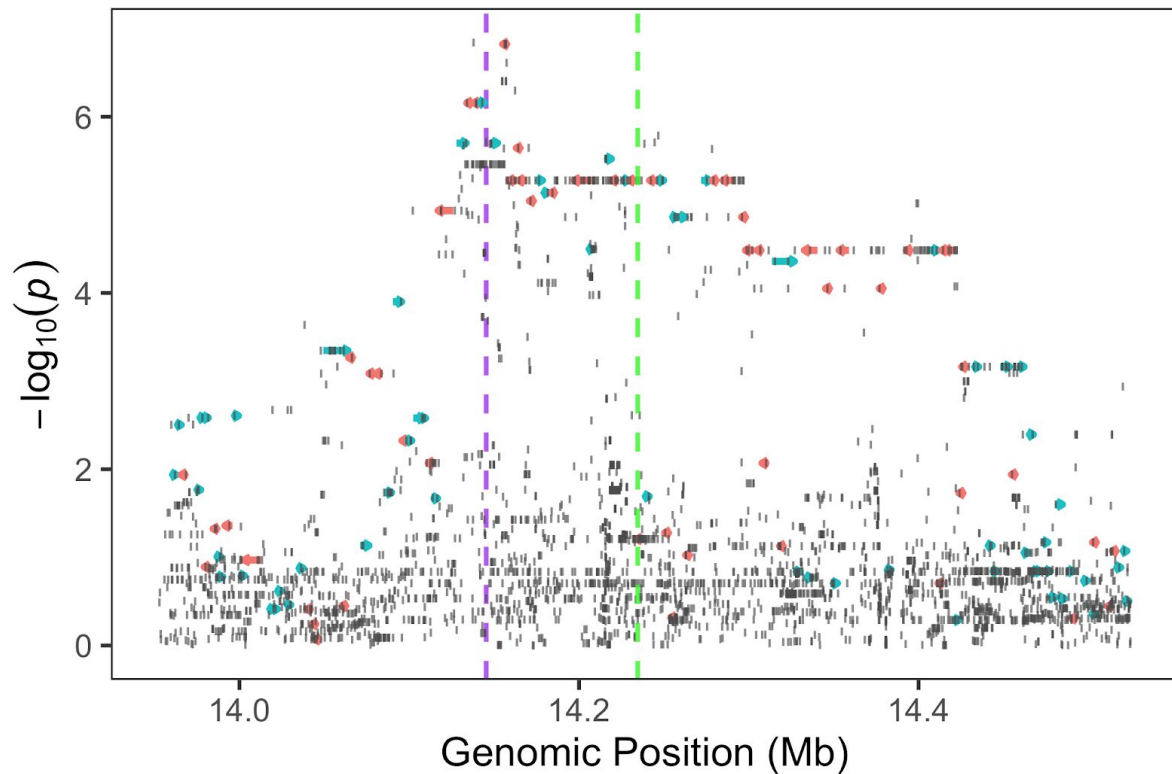

**Supplementary Fig. 4: *dauf-1* QTL contains two *ascr#5* receptor genes, *srg-36* and *srg-37***

A plot for fine-mapping of *ascr#5* response across the *dauf-1* QTL. Each grey bar represents a SNV or indel that is present in at least 5% of the 157 wild strains assayed for dauer formation. The genomic position in Mb is plotted on the x-axis, and the statistical significance of the correlation between genotype and phenotype is plotted on the y-axis. Genes in the region are labeled as colored arrows (skyblue: forward, orange: reverse). The peak of *dauf-1* QTL from GWA mapping is represented by vertical purple line. The location of *srg-36* and *srg-37* is represented by vertical green line.

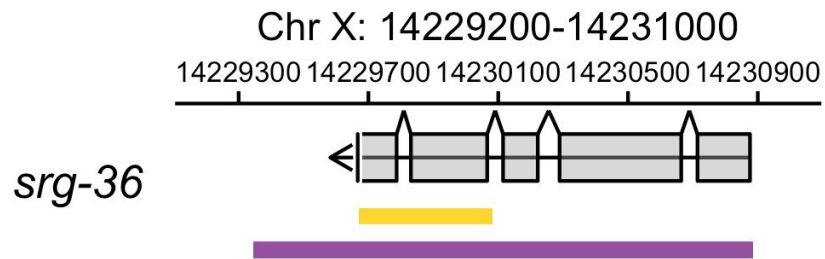

**Supplementary Fig. 5: A schematic plot for *srg-36* gene structure**

A schematic plot for the *srg-36* gene structure (grey), the 411-bp natural deletion allele *ean178* (yellow), and the CRISPR-Cas9 loss-of-function deletion (purple) are shown.

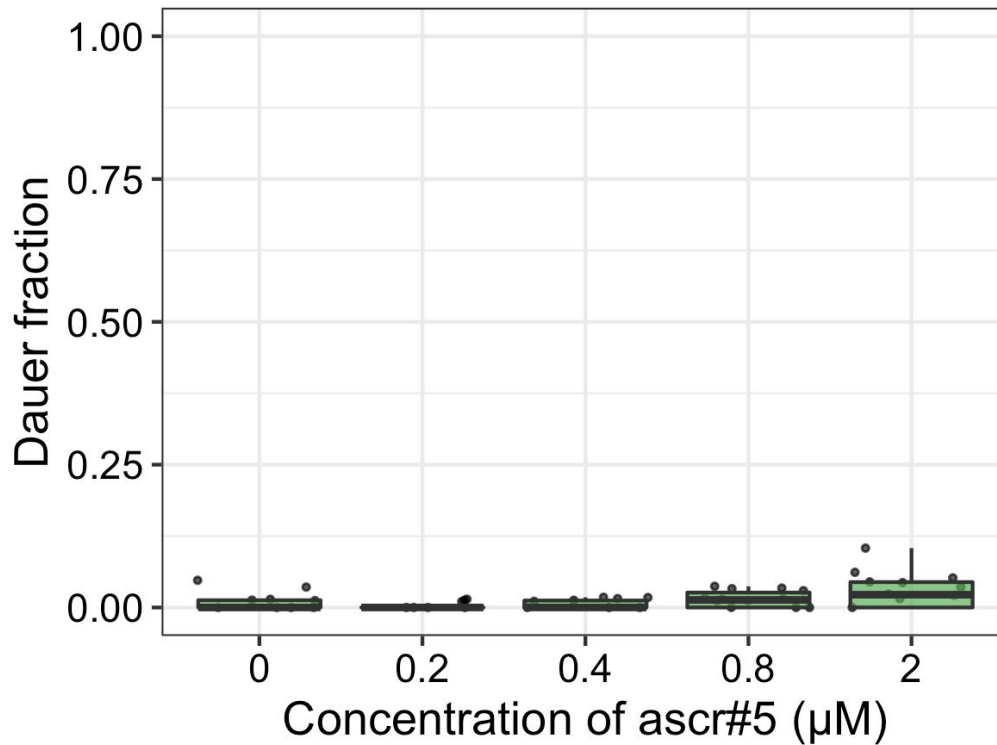

**Supplementary Fig. 6: PB303, a unique strain that has a deleted *srg-36*, is insensitive to *ascr#5***

Tukey box plots of the *ascr#5* dose response at 25°C for PB303 that carries the *srg-36(ean178)* deletion allele are shown with data points plotted behind. Concentrations of *ascr#5* are shown on the x-axis, and the fraction of dauer formation is shown on the y-axis. The horizontal line in the middle of the box is the median, and the box denotes the 25th to 75th quantiles of the data. The vertical line represents the 1.5 interquartile range.

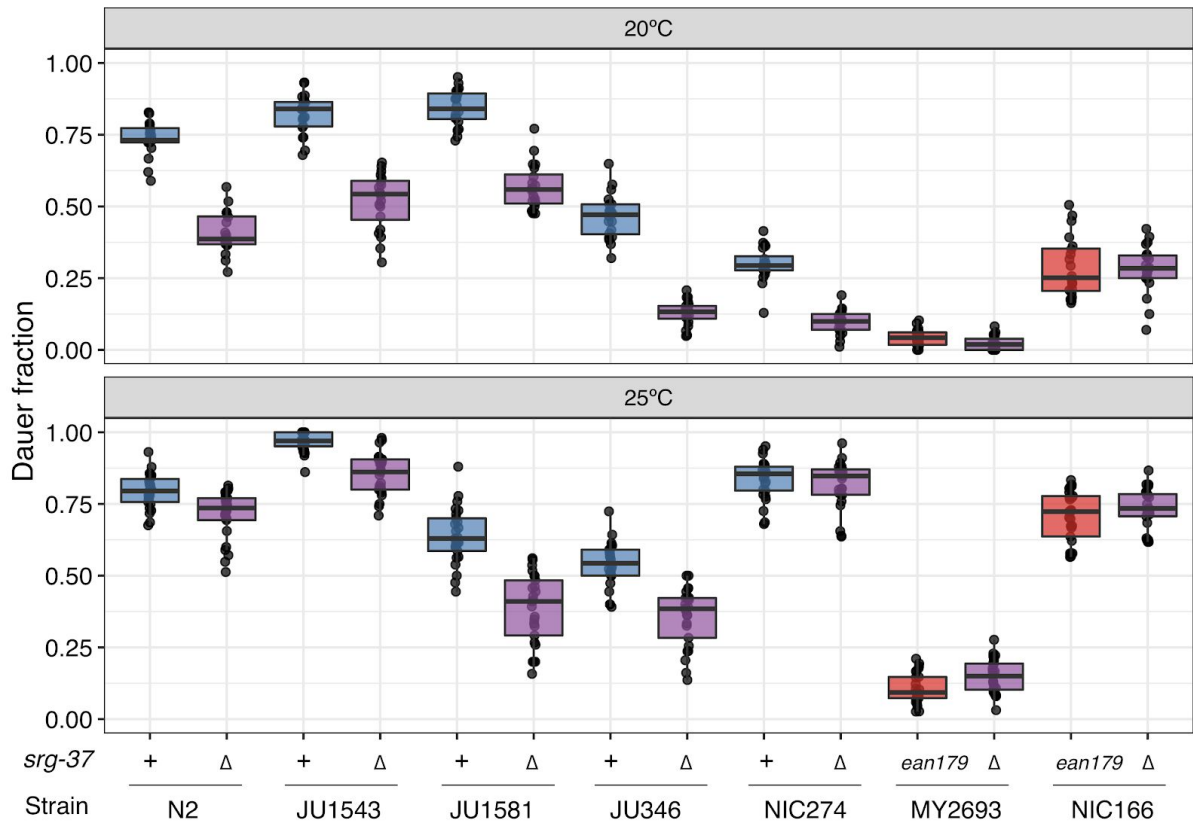

**Supplementary Fig. 7: The *srg-37(ean179)* deletion is a putative loss-of-function allele**

Tukey box plots of *srg-37* loss-of-function experiments in dauer pheromone conditions (800 nM of *ascr#5*) at 20°C (top) and 25°C (bottom) are shown with data points plotted behind. Each box plot is colored by the genotypes of *srg-37*, where *srg-37(+)* is blue, *srg-37(ean179)* is red, and CRISPR-Cas9-generated *srg-37(lf)* is purple. Wild isolates and the putative *srg-37* loss-of-function deletion mutants for each genetic background ( $\Delta$ ) are paired on the x-axis. The fraction of dauer formation is shown on the y-axis. The horizontal line in the middle of the box is the median, and the box denotes the 25th to 75th quantiles of the data. The vertical line represents the 1.5 interquartile range.



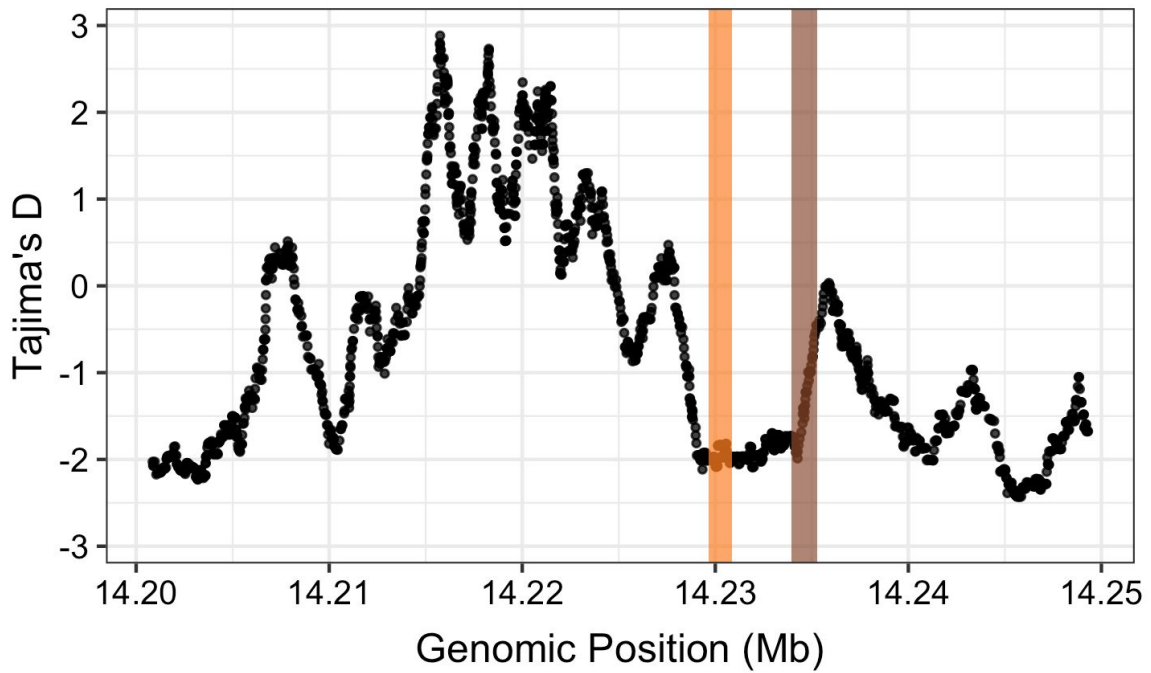

**Supplementary Fig. 8: Tajima's D statistics decrease around *srg-36* gene**

Tajima's D statistics for a region of X chromosome including *srg-36* *srg-37* locus are shown. Each dot corresponds to a Tajima's D statistic calculated from the allele frequency spectrum of 50 SNVs across 249 wild isolates. Colored lines highlight coding regions of *srg-36* (orange) and *srg-37* (brown).

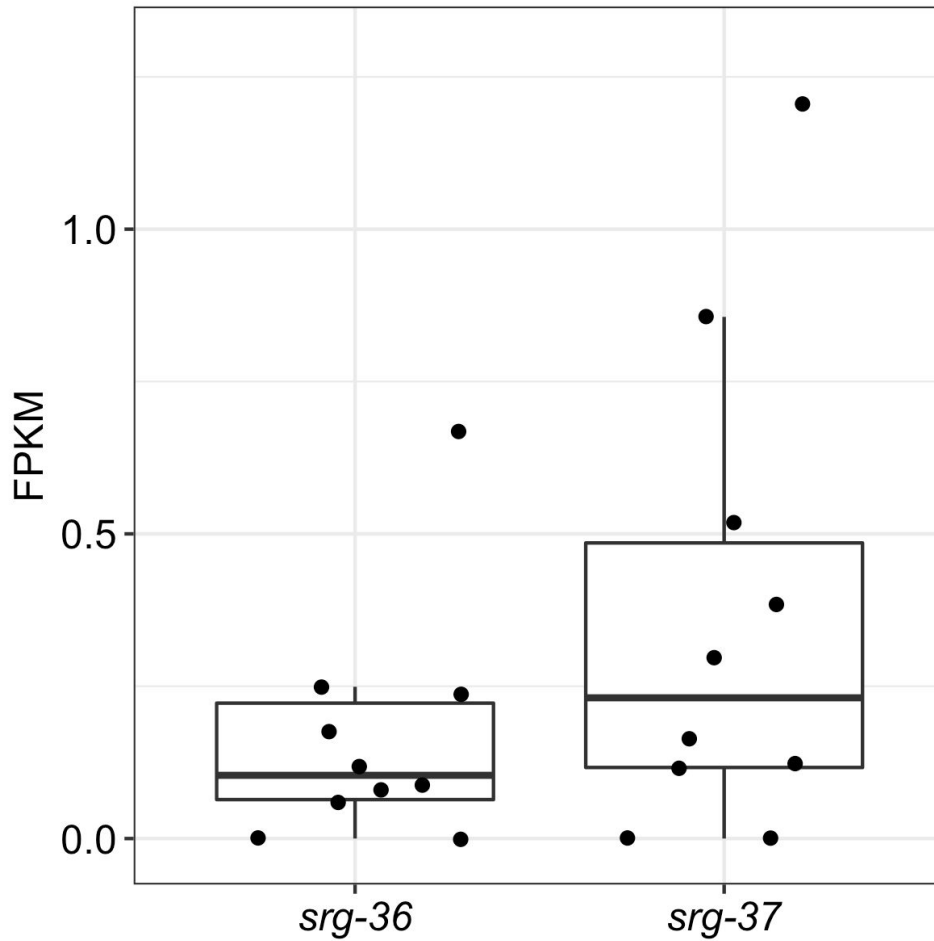

**Supplementary Fig. 9: Gene expression levels are not significantly different between *srg-36* and *srg-37***

Tukey box plots of the gene expression levels of *srg-36* and *srg-37*. Each dot corresponds to average FPKM value of each gene at L1 stage from independent RNA-seq experiments. The horizontal line in the middle of the box is the median, and the box denotes the 25th to 75th quantiles of the data. The vertical line represents the 1.5 interquartile range.



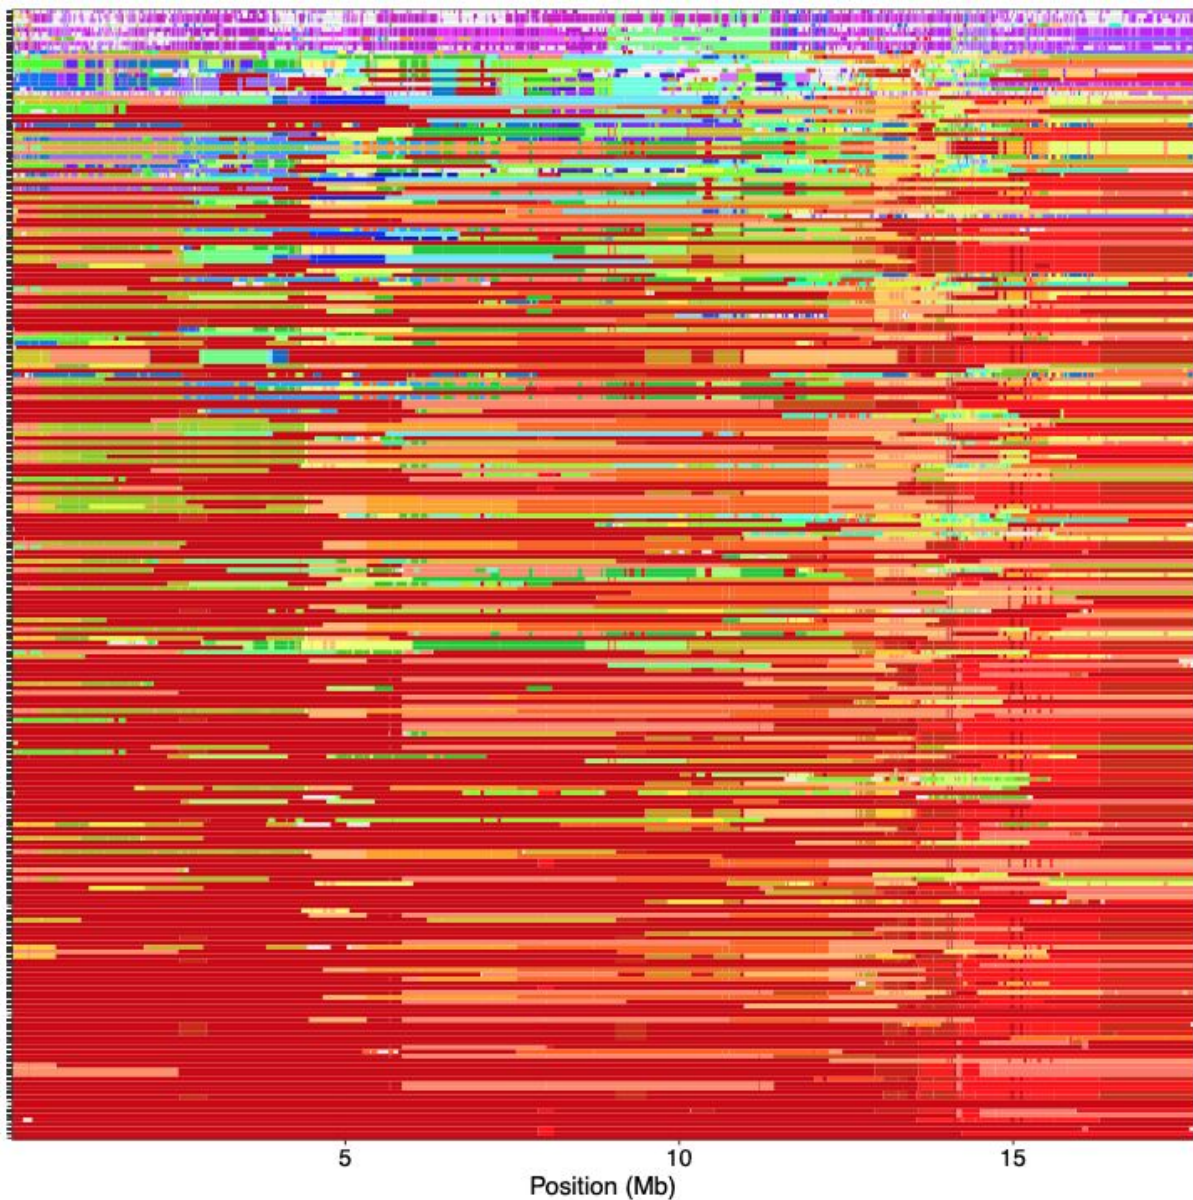

**Supplementary Fig. 11: X chromosome sharing of 249 wild strains reveals swept regions where haplotype diversity is reduced**

X chromosome sharing plots with color-coded haplotype segments of the 249 wild strains of *C. elegans* are shown. Each row corresponds to genetically unique single genome-wide genotypes (isotype), ordered roughly by the extent of haplotype sharing. Shared chromosome regions are shown with the same color. Genomic position on the X chromosomes is shown on the x-axis. Note that similarity in colors does not imply similarity in genotype.

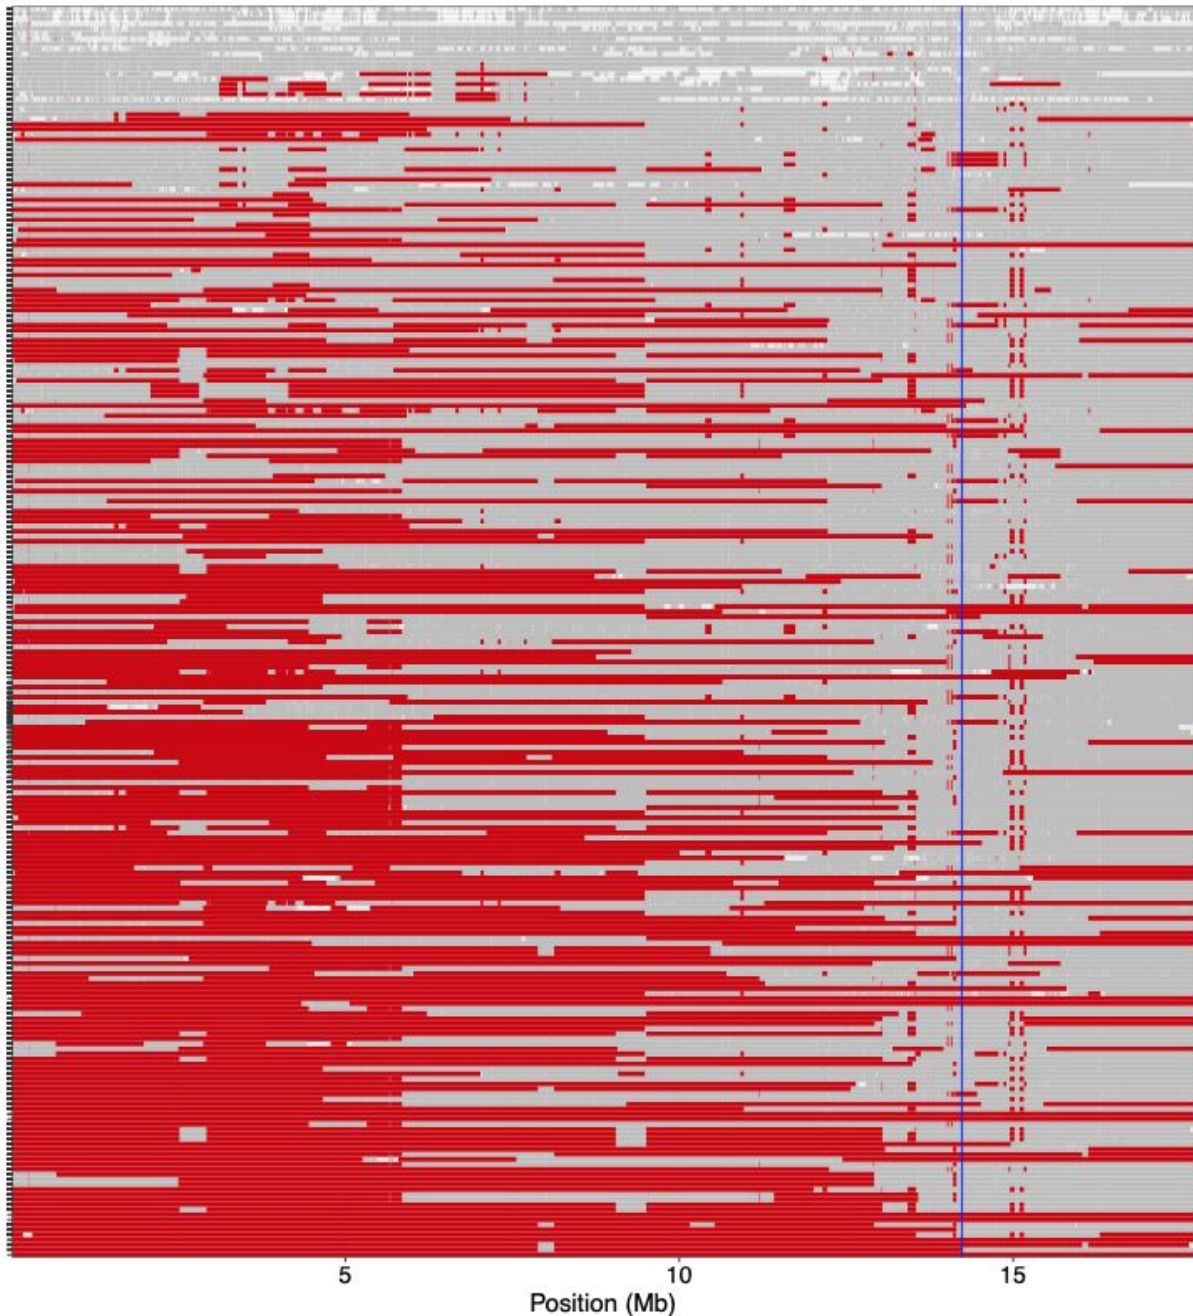

**Supplementary Fig. 12: *srg-37* is located far from the left arm of the X chromosome, which is frequently swept across 249 wild *C. elegans* strains**

A modified X chromosome sharing plots with the swept haplotype colored as red and other haplotypes as grey are shown. The swept haplotype is defined as a haplotype that is identical-by-descent and most frequently shared across 249 wild *C. elegans* strains. Each row shows the genotype of one of the 249 wild isolates, ordered by the extent of swept haplotype sharing. Genomic position is shown on the x-axis. The blue vertical lines denote the *srg-36 srg-37* locus.

**a**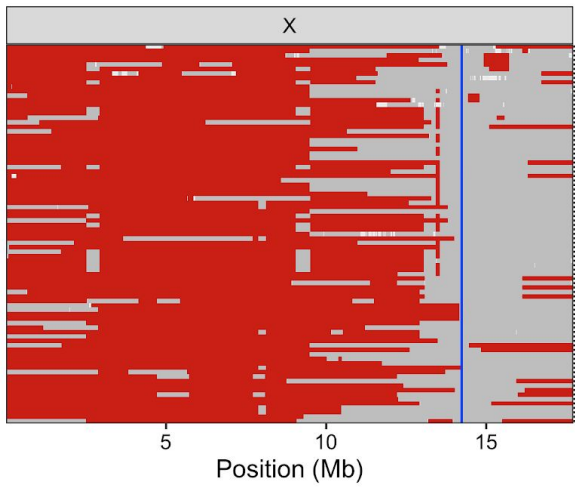**b**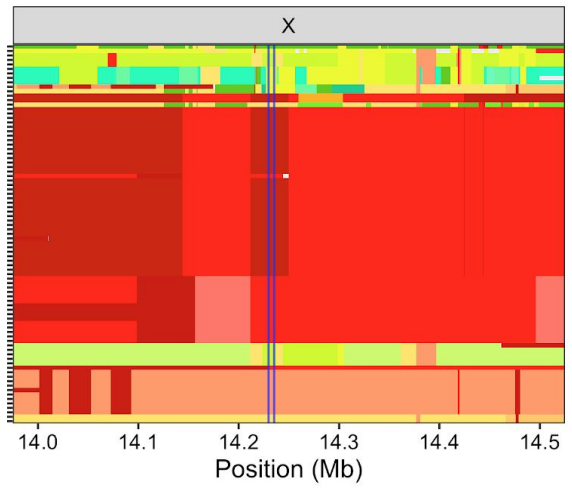**c**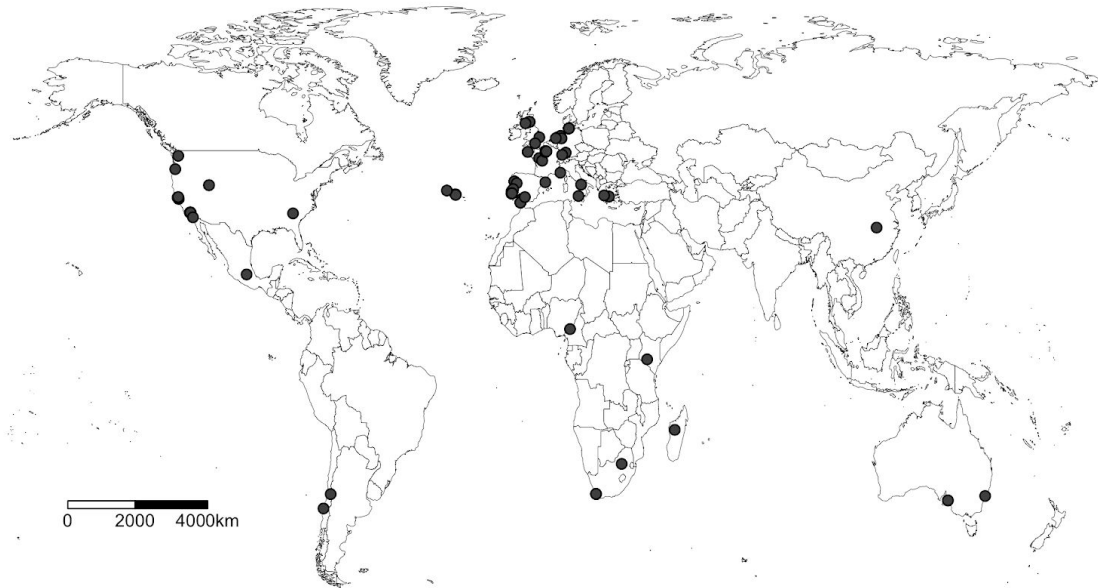

### Supplementary Fig. 13: *srg-37(ean179)* is outcrossed by multiple genotypes

The outcrossed subpopulation is defined as a subset of strains with the swept haplotype segments that span more than 50% of the X chromosome except *srg-37* locus. This outcrossed subpopulation comprises 85 wild strains.

(a) A modified haplotype sharing plot with the swept haplotype colored as red and other haplotypes colored grey. Each row is one of the wild isolates that belongs to the outcrossed subpopulation, ordered roughly by the extent of the swept haplotype sharing.

(b) A haplotype sharing plot with color-coded haplotype segments of outcrossed subpopulation across the X chromosome region (X: 14.0 Mb - 14.5 Mb) flanking and including *srg-36* and *srg-37*. Note that red and dark red color are not swept haplotypes. All shown haplotypes were color-coded by grey in (a).

(a, b) The blue vertical lines denote the *srg-36* *srg-37* locus.

(c) The geographic locations of 85 outcrossed wild strains are shown as grey circles. A scale bar is shown in the map.

a

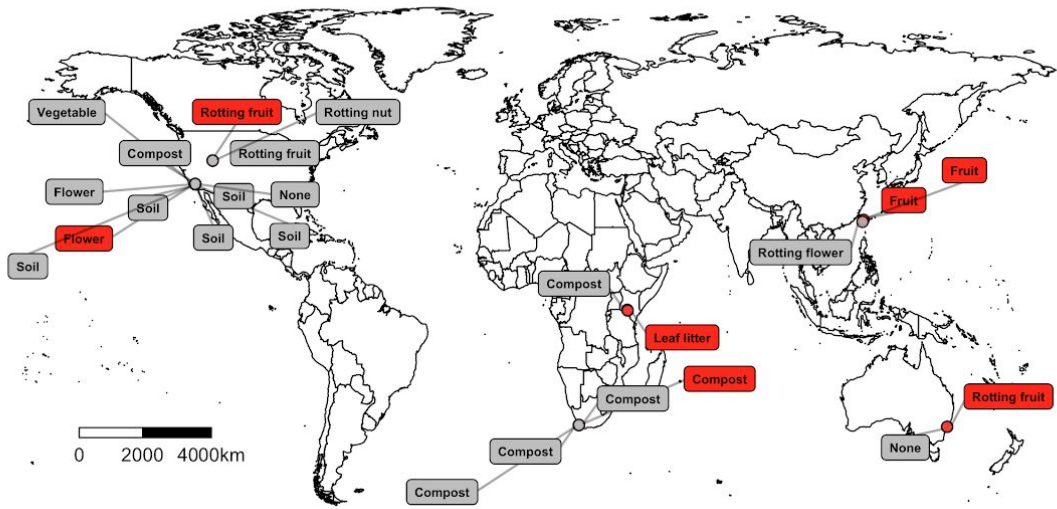

b

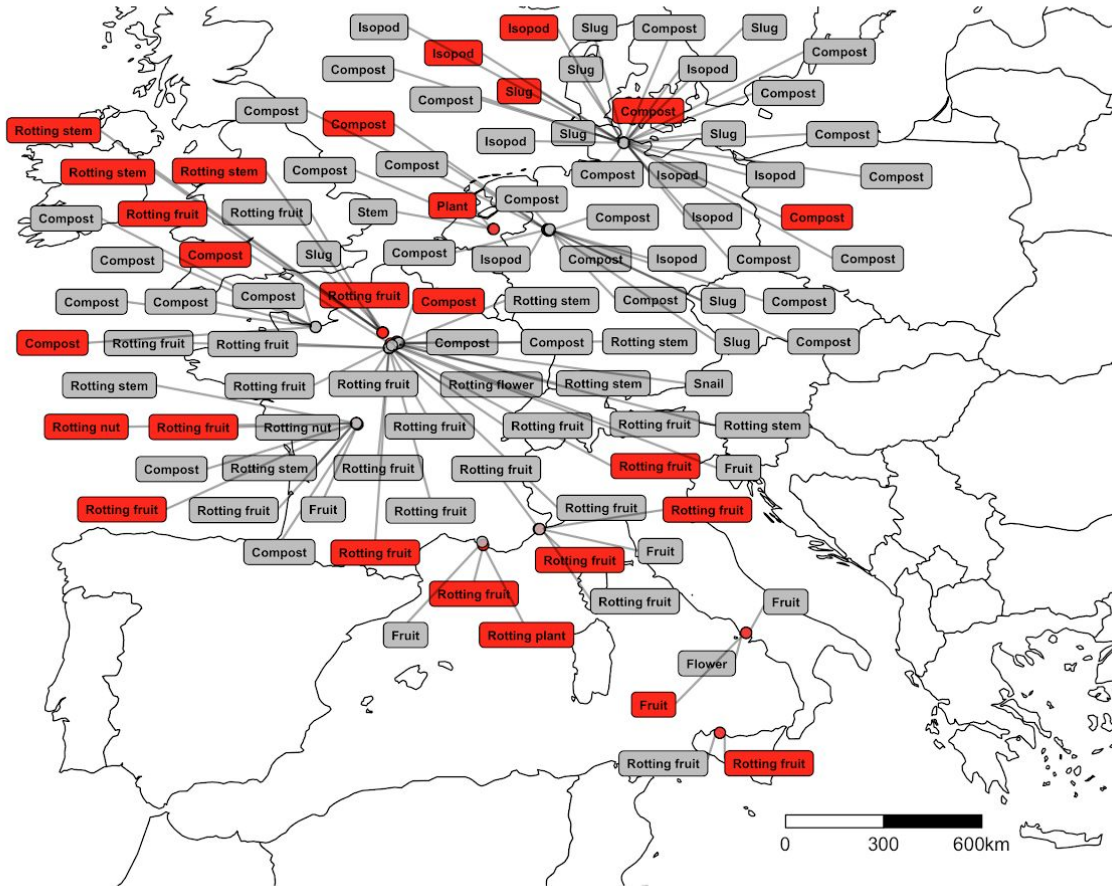



**Supplementary Fig. 14: Two *srg-37* genotypes are isolated in the local habitat across the world**

Wild strains that are isolated from locations where both genotypes of *srg-37* were found are shown on the map of (a) world and (b) Europe. Each box indicates the substrate type where each strain is isolated, and is colored by the *srg-37* genotype of the isolated strain (grey: wild-type, red: *ean179*). Scale bars are shown in the map.

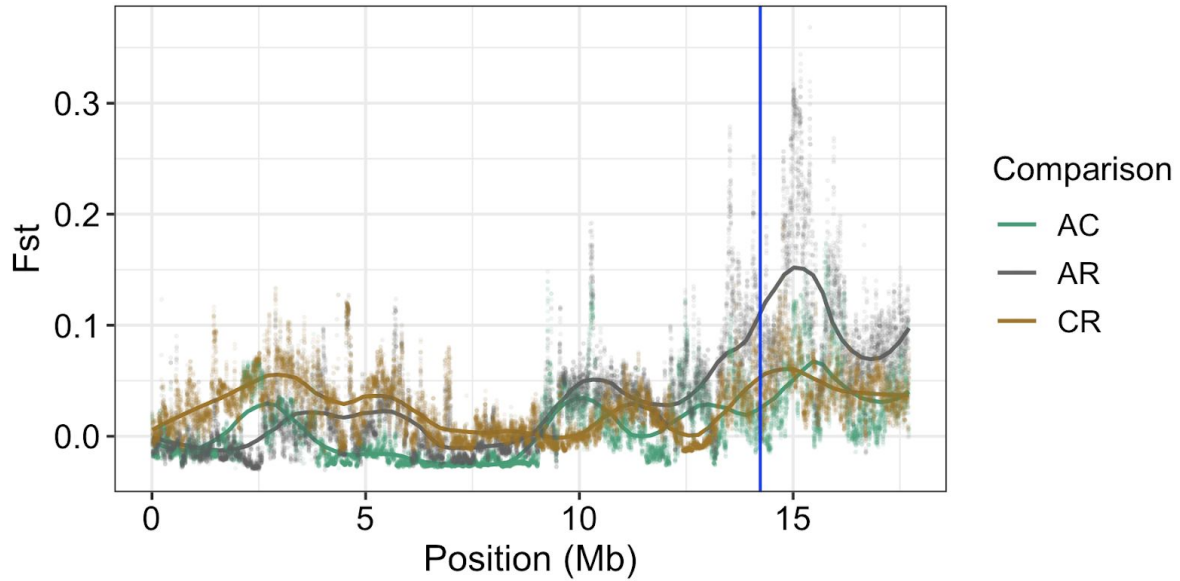

**Supplementary Fig. 15: High genetic divergence at *srg-37* locus is observed between niche-associated subpopulations**

The X chromosome-wide  $F_{ST}$  statistics between animal-compost (AC, green), animal-rotting fruit (AR, grey), and compost-rotting fruit (CR, brown) subpopulations from Fig. 4e are shown.  $F_{ST}$  was calculated with a window size of 10 kb and a step size of 1 kb. Each dot corresponds to the  $F_{ST}$  statistic of an individual window. Smoothed lines are LOESS fits. The blue vertical line denotes the location of the *srg-37* gene.

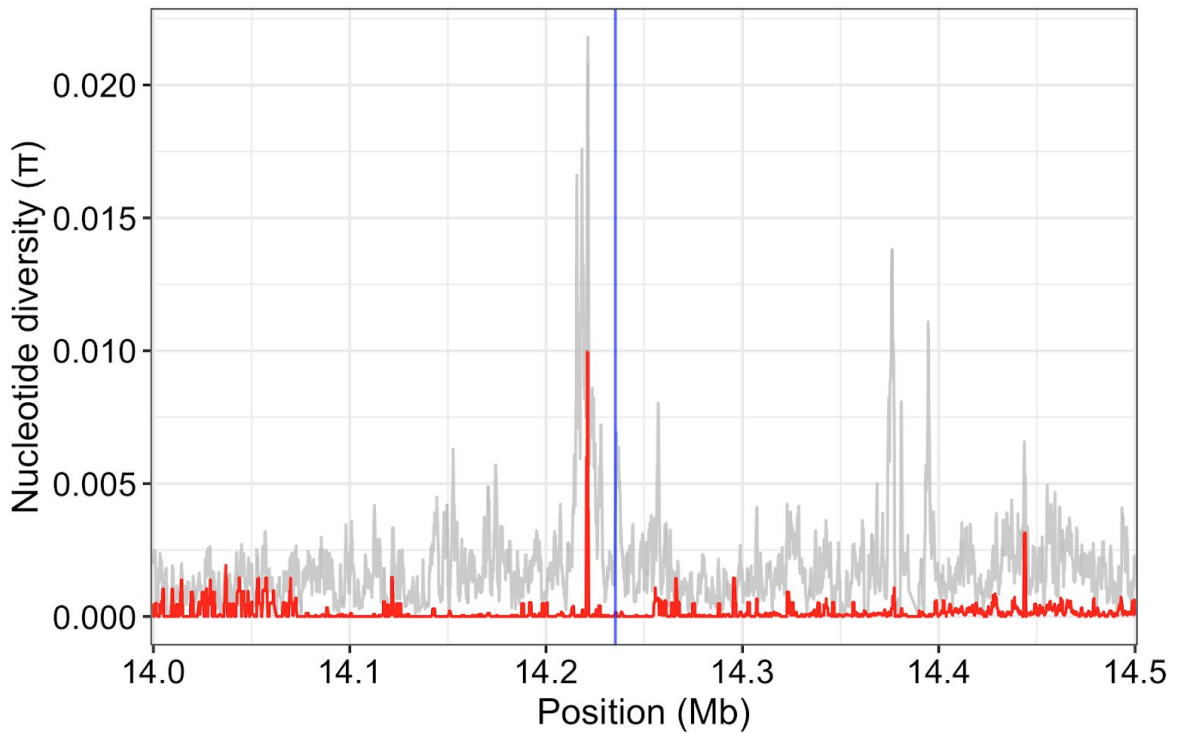

**Supplementary Fig. 16: Nucleotide diversity ( $\pi$ ) across *srg-37* locus is low for wild strains with the *srg-37* deletion**

Line plots for nucleotide diversity ( $\pi$ ) across the *srg-37* locus is shown.  $\pi$  was calculated for the subpopulation with the *srg-37(+)* allele (grey) and the subpopulation with the *srg-37(ean179)* deletion allele (red) with a window size of 1 kb and a step size of 100 bp. The blue vertical line denotes the location of the *srg-37* gene.

**Supplementary Table 1: Oligonucleotides and crRNAs used in this study**

| Class           | ID       | Sequences               | Description                                      | Source |
|-----------------|----------|-------------------------|--------------------------------------------------|--------|
| Oligonucleotide | oECA1429 | GTAACCGCTGTCATCTGTGC    | <i>srg-37</i> genotyping external/forward primer | IDT    |
| Oligonucleotide | oECA1430 | CCTGATGCATATTTCTTGATCTG | <i>srg-37</i> genotyping reverse primer          | IDT    |
| Oligonucleotide | oECA1435 | TGGATTCCTTGCTCCAAATC    | <i>srg-37</i> genotyping internal/forward primer | IDT    |
| Oligonucleotide | oECA1460 | CTTTGAGAATATGACACGCC    | <i>srg-36</i> genotyping external/forward primer | IDT    |
| Oligonucleotide | oECA1461 | CTCGACACGCTGTGTTTCTA    | <i>srg-36</i> genotyping external/reverse primer | IDT    |
| Oligonucleotide | oECA1462 | CAACGCTGTCCGTGATAACT    | <i>srg-36</i> genotyping internal/forward primer | IDT    |
| Oligonucleotide | oECA1463 | CTCGACACGCTGTGTTTCTA    | <i>srg-36</i> genotyping internal/reverse primer | IDT    |
| crRNA           | crECA76  | TAAAGCTGTTTAGATAGGTA    | <i>srg-37</i> exon 2 targeting crRNA             | IDT    |
| crRNA           | crECA77  | CGAACGTTTACCCTTTCTCA    | <i>srg-37</i> exon 5 targeting crRNA             | IDT    |
| crRNA           | crECA82  | GCCAGCGTCATACCAACAGG    | <i>srg-36</i> 5' targeting crRNA                 | IDT    |
| crRNA           | crECA83  | TAACGCGAATAGAGGATCGG    | <i>srg-36</i> 3' targeting crRNA                 | IDT    |
